# Supplementary material
Source: publisher figshare collection journal article supplement (https://frontiersin.figshare.com/ndownloader/files/24012524)
Supplement: Supplementary file 1 [file 24012524]

**Supplemental File S3.****Instructor's Rubric for Grading of Group Role-play Assignment:**

| <b>Performance Criteria / Levels</b>                          | <b>Poor</b>                                                                                          | <b>Adequate</b>                                                            | <b>Good</b>                                                                                          | <b>Excellent</b>                                                                                 |
|---------------------------------------------------------------|------------------------------------------------------------------------------------------------------|----------------------------------------------------------------------------|------------------------------------------------------------------------------------------------------|--------------------------------------------------------------------------------------------------|
| <b>Engagement of all group members in the activity</b>        | Not all group members participated or provided a description of their protein's role in the process. | Some group members showed minimal engagement with the exercise             | All group members showed good engagement in the exercise                                             | All group members showed good engagement and some exceptional engagement with the exercise       |
| <b>Effort put into production of the video</b>                | Many errors, mistakes or instances of forgetting the script. Sound or visuals not clear.             | Sound and visuals are clear and performance mostly free of errors.         | Sound and visuals clear, few errors, editing of the video to enhance professionalism.                | Exceptional use of editing or special effects. Excellent use of location or props for the video. |
| <b>Accuracy of portrayal of assigned cell biology process</b> | Several scientific inaccuracies in the video or lack of detail in the portrayal.                     | Reasonable scientific detail with one or two minor inaccuracies.           | Good level of detail, minor details omitted, no inaccuracies.                                        | High level of detail, no inaccuracies.                                                           |
| <b>Creativity of the portrayal of process</b>                 | Portrayal did not go much beyond a text based description of the process.                            | Process portrayed in a standard manner, adequately executed                | Process portrayed in a standard manner, well executed                                                | Process portrayed in an unusual/ original manner, very well executed                             |
| <b>Success in engaging the audience</b>                       | Poor visuals / props, scripts read in non-engaging manner                                            | Good concept and visuals but only adequate deliver of script of the video. | Good delivery of the script and use of dramatic effect, visuals, comedy etc. to engage the audience. | Exceptional delivery and use of dramatic effect, visuals, comedy etc. to engage audience.        |

**Guide to Grading**

>80% - Excellent in all criteria

70-79% - Mostly good; excellent in some criteria

60-69% - Mostly good; adequate in some criteria

50-59 – Mostly adequate; good in some criteria

40-49 – Mostly adequate; poor in some criteria

< 40% – Poor in all criteria
